# Supplementary material for: Growing role of secondary organic aerosol in the North China Plain from 2014 to 2024
Source: Copernicus journal article supplement (doi:10.5194/egusphere-2025-2521), 2025-07-25
Supplement: Supplementary file 1 [file egusphere-2025-2521-supplement.pdf]

Supplementary for

## **Growing role of secondary organic aerosol in the North China Plain from 2014 to 2024**

Chunshui Lin<sup>1</sup>, Ru-Jin Huang<sup>1,2\*</sup>, Jing Duan<sup>1</sup>, Jing Qu<sup>1</sup>, Jiahua Liu<sup>1</sup>, Yi Liu<sup>1</sup>, Yan Luo<sup>1</sup>, Wei Huang<sup>1</sup>, Wei Xu<sup>3</sup>, Yanan Zhan<sup>1,2</sup>, Zhitao Liu<sup>4,5</sup>, Sihan Liu<sup>4,5</sup>, Qingshuang Zhang<sup>6</sup>, Quan Liu<sup>7</sup>, Zirui Liu<sup>8</sup>, Shengrong Lou<sup>9,10</sup>, Huinan Yang<sup>10</sup>, Dan Dan Huang<sup>9</sup>, Cheng Huang<sup>9,11</sup>, Hongli Wang<sup>9</sup>

<sup>1</sup>State Key Laboratory of Loess Science, Institute of Earth Environment, Chinese Academy of Sciences, Xi'an 710061, China

<sup>2</sup>Institute of Global Environmental Change, School of Human Settlements and Civil Engineering, Xi'an Jiaotong University, Xi'an 710049, China

<sup>3</sup>Center for Excellence in Regional Atmospheric Environment, Institute of Urban Environment, Chinese Academy of Sciences, Xiamen, China

<sup>4</sup>Key Laboratory of Meteorology and Ecological Environment of Hebei Province, Shijiazhuang 050021, China

<sup>5</sup>Weather Modification Office of Hebei Province, Shijiazhuang 052100, China

<sup>6</sup>Shandong Province Dezhou Ecological Environment Monitoring Center, Dezhou 200235, China

<sup>7</sup>State Key Laboratory of Severe Weather & Key Laboratory of Atmospheric Chemistry of CMA, Chinese Academy of Meteorological Sciences, Beijing 100081, China

<sup>8</sup>State Key Laboratory of Atmospheric Environment and Extreme Meteorology, Institute of Atmospheric Physics, Chinese Academy of Sciences, Beijing 100029, China

<sup>9</sup>Key Laboratory of Formation and Prevention of Urban Air Pollution Complex, Ministry of Ecology and Environment, Shanghai Academy of Environmental Sciences, Shanghai 200233, China

<sup>10</sup>School of Energy and Power Engineering, University of Shanghai for Science and Technology, Shanghai 200093, China

<sup>11</sup>Shanghai Environmental Monitoring Center, Shanghai 200235, China

Correspondence: Ru-Jin Huang (rujin.huang@ieecas.cn)

**This document includes 10 supplementary figures (Fig. S1–S10) and 1 table (Table S1).**

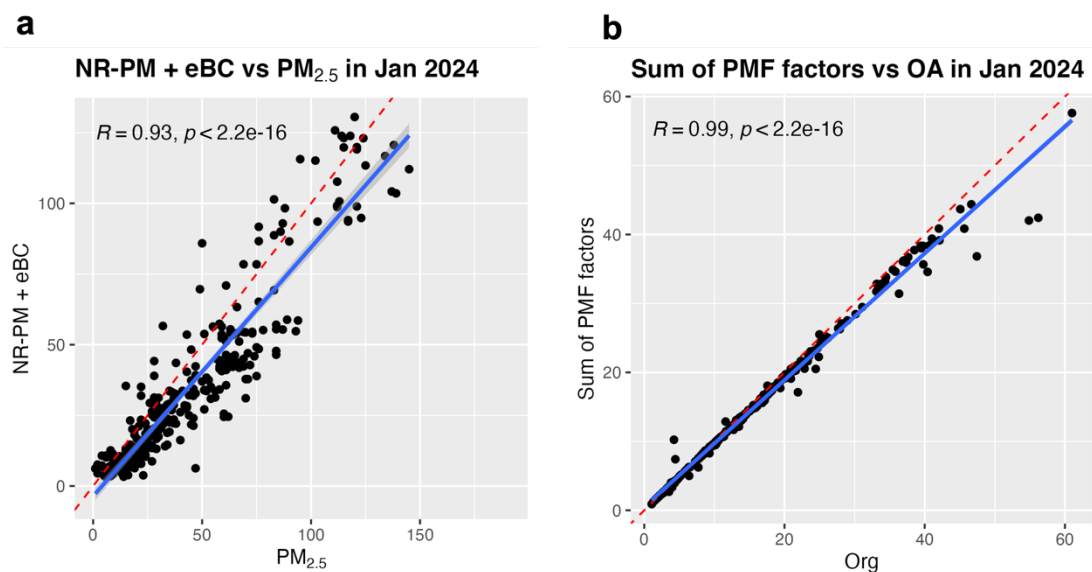

**Figure S1.** (a) scatter plot between the sum of non-refractory particulate matter (NR-PM<sub>2.5</sub>; measured by SP-LToF-AMS) and equivalent black carbon (eBC; measured by AE-33) versus bulk PM<sub>2.5</sub> measured at a nearby air quality monitoring site. (b) Relationship between the sum of organic aerosol (OA) factors and the measured organic concentrations. All values are in  $\mu\text{g m}^{-3}$ . The red dashed line represents the 1:1 ratio, while the blue line indicates the linear fit, with the correlation coefficient and p-value shown in the top left corner.

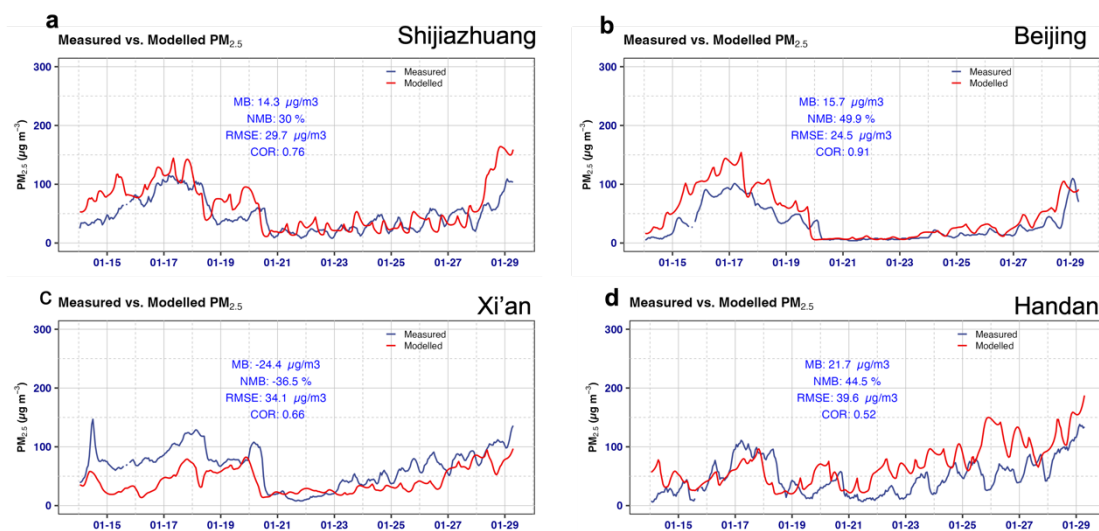

**Figure S2.** Time series of CMAQ-modeled PM<sub>2.5</sub> and measured PM<sub>2.5</sub> in Shijiazhuang (a), Beijing (b), Xi'an (c), and Handan (d). The Mean Bias (MB), Normalized Mean Bias (NMB), Root Mean Square Error (RMSE), and correlation coefficient (r) are displayed in blue text.

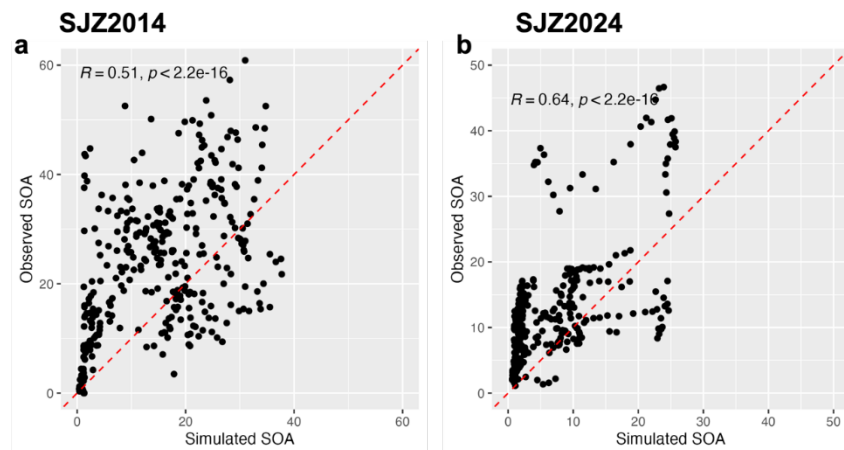

**Figure S3.** comparison of the simulated SOA and observed SOA.

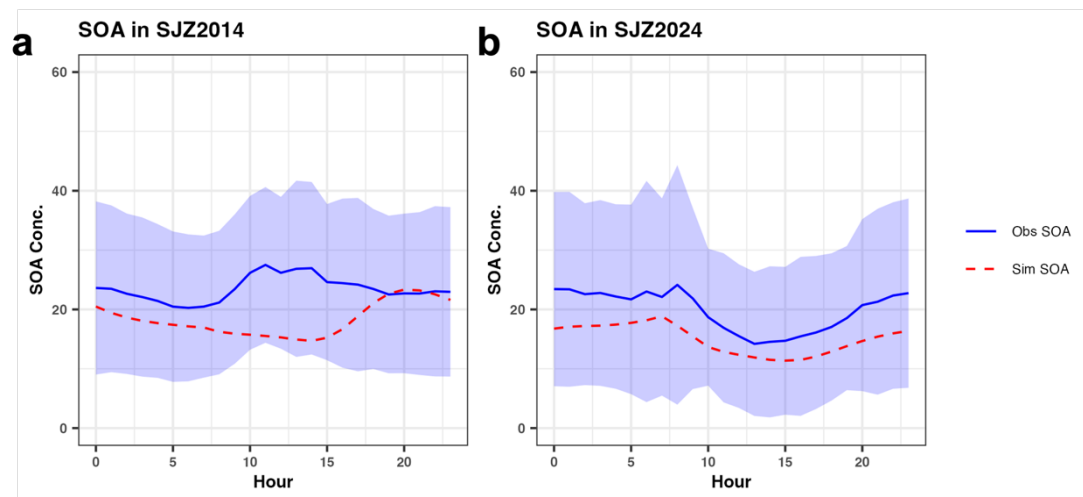

**Figure S4.** Diurnals of observed and simulated SOA using the adjusted model.

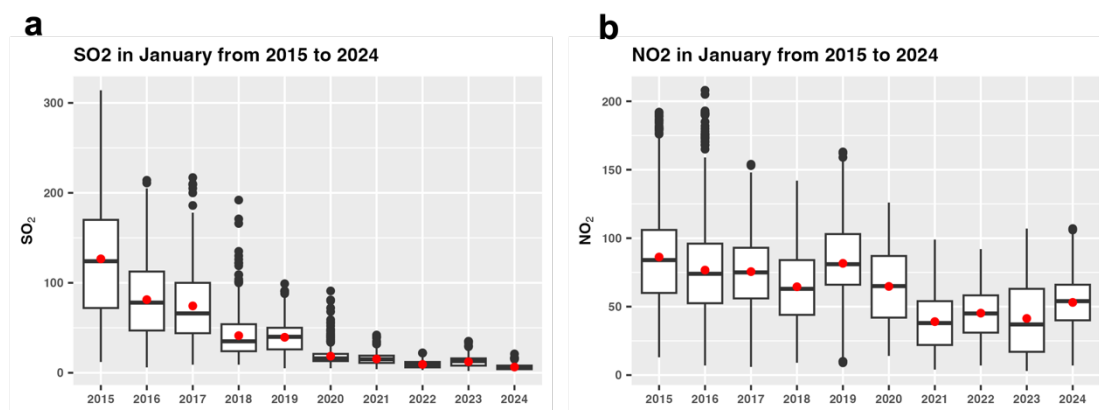

**Figure S5.** Box plot of SO<sub>2</sub> (a) and NO<sub>2</sub> (b) concentrations in January from 2015 to 2024. The box plot displays the 50th percentile (median), 25th percentile, 75th percentile, and the values extending to 1.5 times the interquartile range. The red dot represents the mean concentration, while the black dots outside the box indicate the outliers.

## Ozone in winter Shijiazhuang

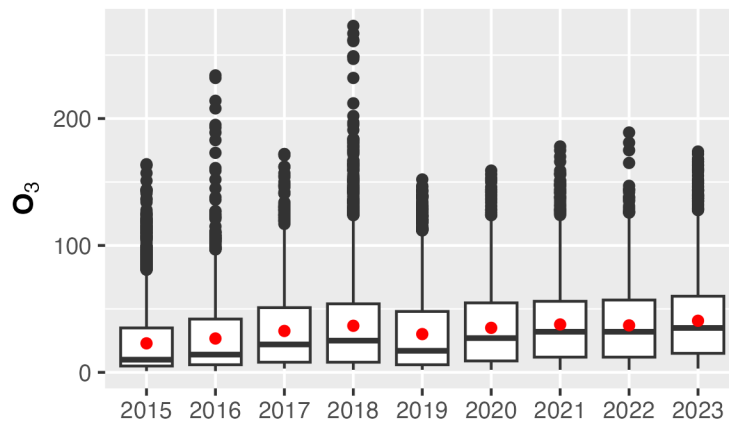

**Figure S6.** Box plot of  $O_3$  concentrations in winter from 2015 to 2024. The box plot displays the 50th percentile (median), 25th percentile, 75th percentile, and the values extending to 1.5 times the interquartile range. The red dot represents the mean concentration, while the black dots outside the box indicate the outliers.

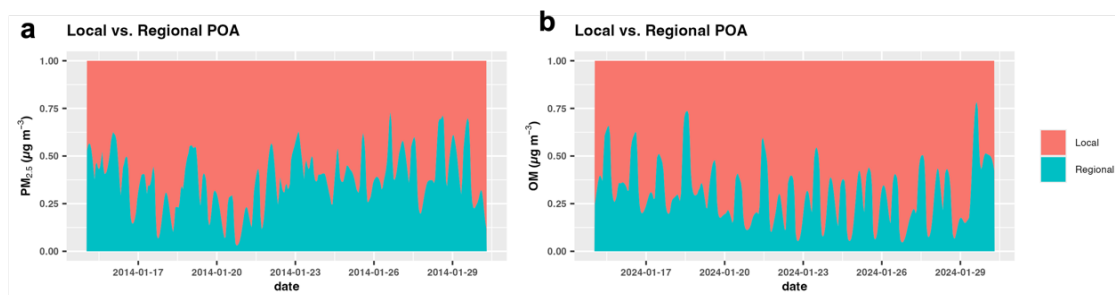

**Figure S7.** Time series of the fraction between local and regional contributions for primary organic aerosol (POA).

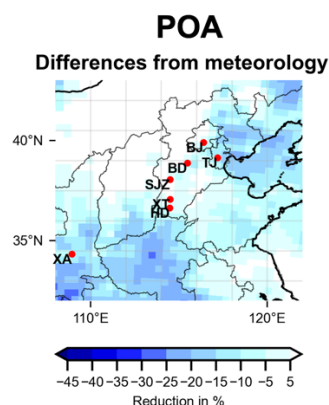

**Figure S8.** Differences in CMAQ simulations attributed to meteorological variations, comparing 2024 with 2014 while using the same emission inventory.

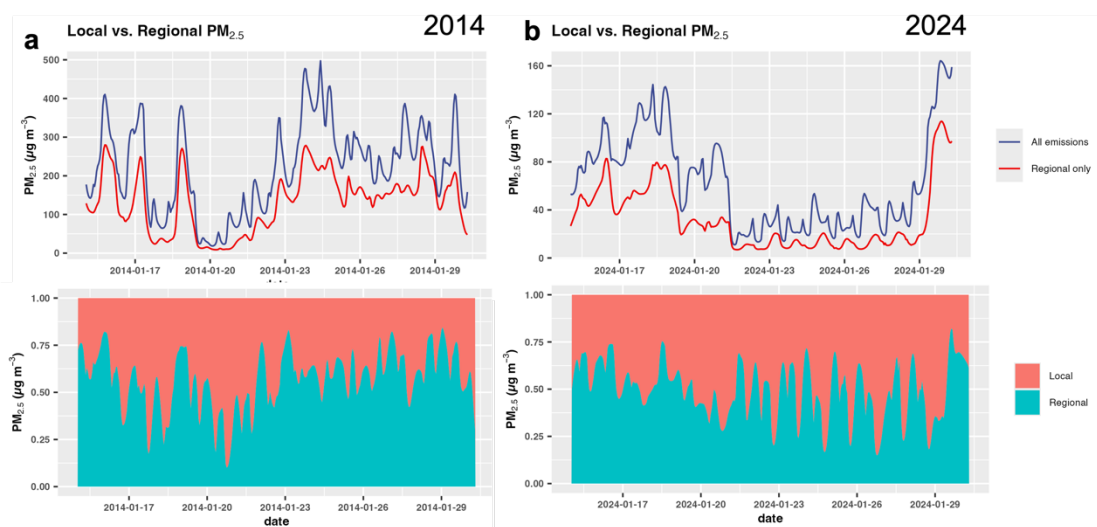

**Figure S9.** Time series of  $PM_{2.5}$  in January 2014, comparing scenarios with all emissions considered (i.e., All Emissions) and with emissions from Shijiazhuang zeroed out (i.e., Regional Only). The difference between "All Emissions" and "Regional Only" represents local emissions. The lower panel displays the time series of the fraction between local and regional contributions.

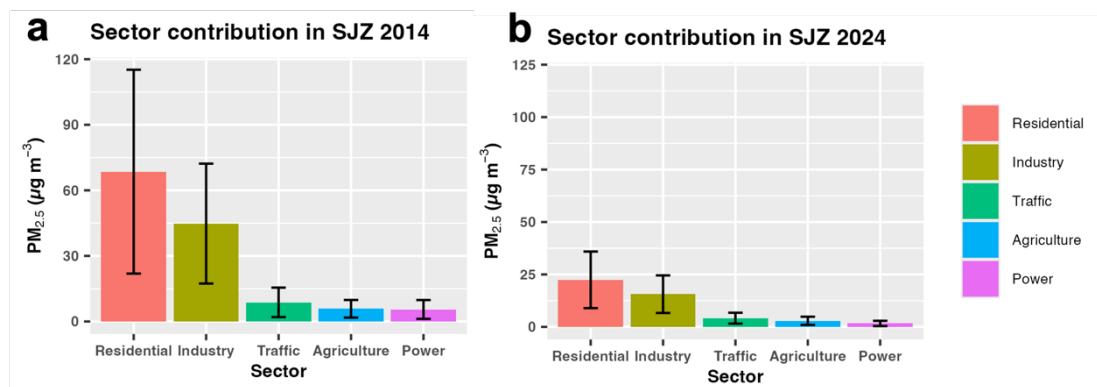

**Figure S10.** The contribution of five major sectors in MEIC, i.e. residential combustion, industry, traffic power generation, agriculture to the total  $PM_{2.5}$  in Shijiazhuang (SJZ) in (a) 2014 and (b) 2024.

**Table S1.** Model set-up in different model runs

| Scenario                                       | Run #               |
|------------------------------------------------|---------------------|
| Without Considering RH-mediated POA conversion | Base                |
| Considering RH-mediated POA conversion         | Adjust              |
| MEIC 2024 + Meteorology 2024                   | Emission diff       |
| MEIC 2014 + Meteorology 2024                   | Emissions diff      |
| MEIC 2024 + Meteorology 2014                   | Meteorological diff |
| MEIC 2024 (zero SJZ) + Meteorology 2024        | Regional vs local   |
| MEIC 2014 (zero SJZ) + Meteorology 2014        | Regional vs local   |
